# Supplementary material
Source: Research Square preprint supplement (doi:10.21203/rs.3.rs-9117735/v1)
Supplement: Supplementary file 1 [file 791d710326067e90dcdc9678.docx]

**Table S1.** Characteristics of P2 polymer batches.

| Designation | Provider | Vendor batch | **NMR** | | | **GPC** | | |
| --- | --- | --- | --- | --- | --- | --- | --- | --- |
| Mn, g/mol | x+z | y | Mn, g/mol | Mw, g/mol | **Đ =** Mw/Mn |
| JR12 | Kabanov lab | n/a | 8,217 | 67 | 19 | 8,917 | 10,727 | 1.20 |
| 1021 | delAQUA Pharmaceuticals | POxi-MBM-352035-V1 | 9,968 | 76 | 26 | 11,857 | 13,422 | 1.13 |

**Table S2.** CA articles from different vendors used in this work

| **Vendor code Name** | **Vendor** | **Lot #** | **CAS #** |
| --- | --- | --- | --- |
| V1 | MedChemExpress (MCE) | 467704 | 3650-09-7 |
| V2 | Tokyo Chemical Industry (TCI) | UOPUK-LL | 3650-09-7 |
| V3 | Sigma-Aldrich | 0000365448 | 3650-09-7 |

**Table S3.** Freeze drying cycle parameters**.**

| **Step** | **Ramp rate (ºC/min)** | **Shelf temp (ºC)** | **Time (hh:mm)** | **Vacuum (mbar)** |
| --- | --- | --- | --- | --- |
| Freeze | 3.00 | -55 | 5:00 | - |
| Dry | 0.3 | 25 | 12:00 | 0.01 |

**Table S4.** A trendline calibration curve and concentration range used for the quantification

| **Component** | **Tr (min)** | **Concentration range (ug/ml)** | **Trendline** | **R2** |
| --- | --- | --- | --- | --- |
| CA V1 | 12.4 | 15.625 - 250 | 11.261x-61.83 | 0.999 |

**Table S5.** Estimated pH and ionic strength of the buffer solutions.

| **Buffer** | **pH** | **Approximate Ionic Strength** |
| --- | --- | --- |
| Citrate | 3.0 | ~0.13–0.15 M |
| Acetate | 4.0 | ~0.01–0.02 M |
|  | 5.0 | ~0.03–0.04 M |
| Phosphate | 6.0 | ~0.15–0.17 M |
|  | 7.4 | ~0.17–0.19 M |
| Borate | 9.0 | ~0.04-0.05 M |
| Carbonate | 10.0 | ~0.16-0.17 M |
